# Supplementary material for: An ecological approach to the development of an active aging measurement in urban areas (AAMU)
Source: BMC Public Health. 2021 Jan 3;21:4. doi: 10.1186/s12889-020-10036-5 (PMC7778809; doi:10.1186/s12889-020-10036-5)
Supplement: Supplementary file 1 — Additional file 1. Questionnaire for Measuring Active Aging. The online Questionnaire in the first round of Delphi. [file 12889_2020_10036_MOESM1_ESM.docx]

**Additional File 1:**

Questionnaire for Measuring Active Aging

The online Questionnaire in the first round of Delphi

| **Dimensions** | **Criteria** | **Indicators** | Score the degree of importance (1 to 11) | | | | | | | | | | |
| --- | --- | --- | --- | --- | --- | --- | --- | --- | --- | --- | --- | --- | --- |
| Personal characteristic | Personal characteristic | age |  |  |  |  |  |  |  |  |  |  |  |
|  | gender |  |  |  |  |  |  |  |  |  |  |  |
| /determinants | Education |  |  |  |  |  |  |  |  |  |  |  |
|  | Ethnicity |  |  |  |  |  |  |  |  |  |  |  |
|  | Residential tenure |  |  |  |  |  |  |  |  |  |  |  |
|  | Marital status |  |  |  |  |  |  |  |  |  |  |  |
|  | Household size |  |  |  |  |  |  |  |  |  |  |  |
|  | Driving license |  |  |  |  |  |  |  |  |  |  |  |
|  | Employment/ paid work |  |  |  |  |  |  |  |  |  |  |  |
|  | Eating/drinking habitat |  |  |  |  |  |  |  |  |  |  |  |
|  | Family support/ domestic care |  |  |  |  |  |  |  |  |  |  |  |
|  | Self-care |  |  |  |  |  |  |  |  |  |  |  |
|  | Self-promotion |  |  |  |  |  |  |  |  |  |  |  |
|  | Mutual help/ |  |  |  |  |  |  |  |  |  |  |  |
|  | Self-esteem |  |  |  |  |  |  |  |  |  |  |  |
|  | Life satisfaction |  |  |  |  |  |  |  |  |  |  |  |
|  | Travel behaviour |  |  |  |  |  |  |  |  |  |  |  |
| Behavioural attitude/ determinants | Smoking |  |  |  |  |  |  |  |  |  |  |  |
| Alcohol |  |  |  |  |  |  |  |  |  |  |  |
| Length of activity |  |  |  |  |  |  |  |  |  |  |  |
| Place-related | Land- use | Shopping services |  |  |  |  |  |  |  |  |  |  |  |
| service proximity |  |  |  |  |  |  |  |  |  |  |  |
| public facility |  |  |  |  |  |  |  |  |  |  |  |
| mix-use |  |  |  |  |  |  |  |  |  |  |  |
| Facilities management |  |  |  |  |  |  |  |  |  |  |  |
| sports recreation facility |  |  |  |  |  |  |  |  |  |  |  |
|  | Connectivity |  |  |  |  |  |  |  |  |  |  |  |
|  | Accessibility services |  |  |  |  |  |  |  |  |  |  |  |
| Access | Traffic condition |  |  |  |  |  |  |  |  |  |  |  |
|  | Pavement condition |  |  |  |  |  |  |  |  |  |  |  |
|  | Walkable Environment |  |  |  |  |  |  |  |  |  |  |  |
|  | Mobility |  |  |  |  |  |  |  |  |  |  |  |
|  | Transportation |  |  |  |  |  |  |  |  |  |  |  |
| Physical form | Up keeping |  |  |  |  |  |  |  |  |  |  |  |
| Abandon buildings |  |  |  |  |  |  |  |  |  |  |  |
| Presence amenities/infrastructure sufficiency |  |  |  |  |  |  |  |  |  |  |  |
| Urban Block size |  |  |  |  |  |  |  |  |  |  |  |
| Safety |  |  |  |  |  |  |  |  |  |  |  |
| Security |  |  |  |  |  |  |  |  |  |  |  |
| green space |  |  |  |  |  |  |  |  |  |  |  |
| Cityscape/City Image | perceived distance |  |  |  |  |  |  |  |  |  |  |  |
| legibility |  |  |  |  |  |  |  |  |  |  |  |
| Perceived Aesthetics |  |  |  |  |  |  |  |  |  |  |  |
| Natural scenery |  |  |  |  |  |  |  |  |  |  |  |
| Public open spaces | Street lighting |  |  |  |  |  |  |  |  |  |  |  |
| Area open spaces ratio |  |  |  |  |  |  |  |  |  |  |  |
| Recreation Public open spaces |  |  |  |  |  |  |  |  |  |  |  |
| Quietness |  |  |  |  |  |  |  |  |  |  |  |
| cleanness |  |  |  |  |  |  |  |  |  |  |  |
| maintenance |  |  |  |  |  |  |  |  |  |  |  |
| Pollution |  |  |  |  |  |  |  |  |  |  |  |
| Landscaping quality |  |  |  |  |  |  |  |  |  |  |  |
| Housing | Universal design |  |  |  |  |  |  |  |  |  |  |  |
| Residential density |  |  |  |  |  |  |  |  |  |  |  |
| Residential Care Facility |  |  |  |  |  |  |  |  |  |  |  |
| Type of housing |  |  |  |  |  |  |  |  |  |  |  |
| Socio-economic environment | Social Environment | Life expectancy |  |  |  |  |  |  |  |  |  |  |  |
| Quality life |  |  |  |  |  |  |  |  |  |  |  |
| Social interaction/ community activities |  |  |  |  |  |  |  |  |  |  |  |
| Happiness |  |  |  |  |  |  |  |  |  |  |  |
| Social inclusion |  |  |  |  |  |  |  |  |  |  |  |
| Social Inequalities |  |  |  |  |  |  |  |  |  |  |  |
| Social Demography |  |  |  |  |  |  |  |  |  |  |  |
| Social democracy |  |  |  |  |  |  |  |  |  |  |  |
| Participation |  |  |  |  |  |  |  |  |  |  |  |
| Social Support |  |  |  |  |  |  |  |  |  |  |  |
| Education learning |  |  |  |  |  |  |  |  |  |  |  |
| Social capital |  |  |  |  |  |  |  |  |  |  |  |
|  | Religious activity |  |  |  |  |  |  |  |  |  |  |  |
|  | Cultural events |  |  |  |  |  |  |  |  |  |  |  |
| Cultural Environment | Sense place |  |  |  |  |  |  |  |  |  |  |  |
| Economic Environment | healthcare services |  |  |  |  |  |  |  |  |  |  |  |
| limited income |  |  |  |  |  |  |  |  |  |  |  |
| insurance coverage |  |  |  |  |  |  |  |  |  |  |  |
| Socio-economic status |  |  |  |  |  |  |  |  |  |  |  |
| Affordable housing |  |  |  |  |  |  |  |  |  |  |  |
| Car ownership |  |  |  |  |  |  |  |  |  |  |  |
| Homeownership |  |  |  |  |  |  |  |  |  |  |  |
| Household income |  |  |  |  |  |  |  |  |  |  |  |
| Living situation |  |  |  |  |  |  |  |  |  |  |  |
| Governmental | Good Governance | Effective collaboration |  |  |  |  |  |  |  |  |  |  |  |
| Performance orientation |  |  |  |  |  |  |  |  |  |  |  |
| governance |  |  |  |  |  |  |  |  |  |  |  |
| Equity |  |  |  |  |  |  |  |  |  |  |  |
| Health | Physical Health | Disability |  |  |  |  |  |  |  |  |  |  |  |
| Public Health |  |  |  |  |  |  |  |  |  |  |  |
| Incidence of disease |  |  |  |  |  |  |  |  |  |  |  |
| Pain feeling |  |  |  |  |  |  |  |  |  |  |  |
| Functional ability |  |  |  |  |  |  |  |  |  |  |  |
| Risk institutionalisation |  |  |  |  |  |  |  |  |  |  |  |
| Self-reported falls |  |  |  |  |  |  |  |  |  |  |  |
| Self-reported health |  |  |  |  |  |  |  |  |  |  |  |
| Physical activity |  |  |  |  |  |  |  |  |  |  |  |
| Activities daily living |  |  |  |  |  |  |  |  |  |  |  |
| Genetic factors |  |  |  |  |  |  |  |  |  |  |  |
| BMI |  |  |  |  |  |  |  |  |  |  |  |
| Sleep hygiene |  |  |  |  |  |  |  |  |  |  |  |
| Personal hygiene |  |  |  |  |  |  |  |  |  |  |  |
| Mental Health | Depressive |  |  |  |  |  |  |  |  |  |  |  |
| Cognitive functioning |  |  |  |  |  |  |  |  |  |  |  |
| Psychological distress |  |  |  |  |  |  |  |  |  |  |  |
| Psychological well-being |  |  |  |  |  |  |  |  |  |  |  |
| Anxiety |  |  |  |  |  |  |  |  |  |  |  |
| Anger |  |  |  |  |  |  |  |  |  |  |  |
| Restorative activity |  |  |  |  |  |  |  |  |  |  |  |
| Spiritual activity |  |  |  |  |  |  |  |  |  |  |  |
| Self-actualisation |  |  |  |  |  |  |  |  |  |  |  |
| Social Health | Relation to family |  |  |  |  |  |  |  |  |  |  |  |
| Relation work |  |  |  |  |  |  |  |  |  |  |  |
| social life |  |  |  |  |  |  |  |  |  |  |  |
| sense community |  |  |  |  |  |  |  |  |  |  |  |
| 1 Please add your proposed indicators?  2 Please mention your suggestion for dimensions, principle and indicators? | | | | | | | | | | | | | |
